# Supplementary material for: Anthocyanin Characterization, Total Phenolic Quantification and Antioxidant Features of Some Chilean Edible Berry Extracts
Source: PubMed Central journal article supplement (PMC6271127; doi:10.3390/molecules190810936), 2014-07-28

## Supplementary Materials

**Figure S1.** Antioxidant capacities of six Chilean berries from the VIII region of Chile. **(a)** DPPH scavenging assay; **(b)** Ferric reducing antioxidant power assay; and **(c)** Superoxide anion scavenging assay.

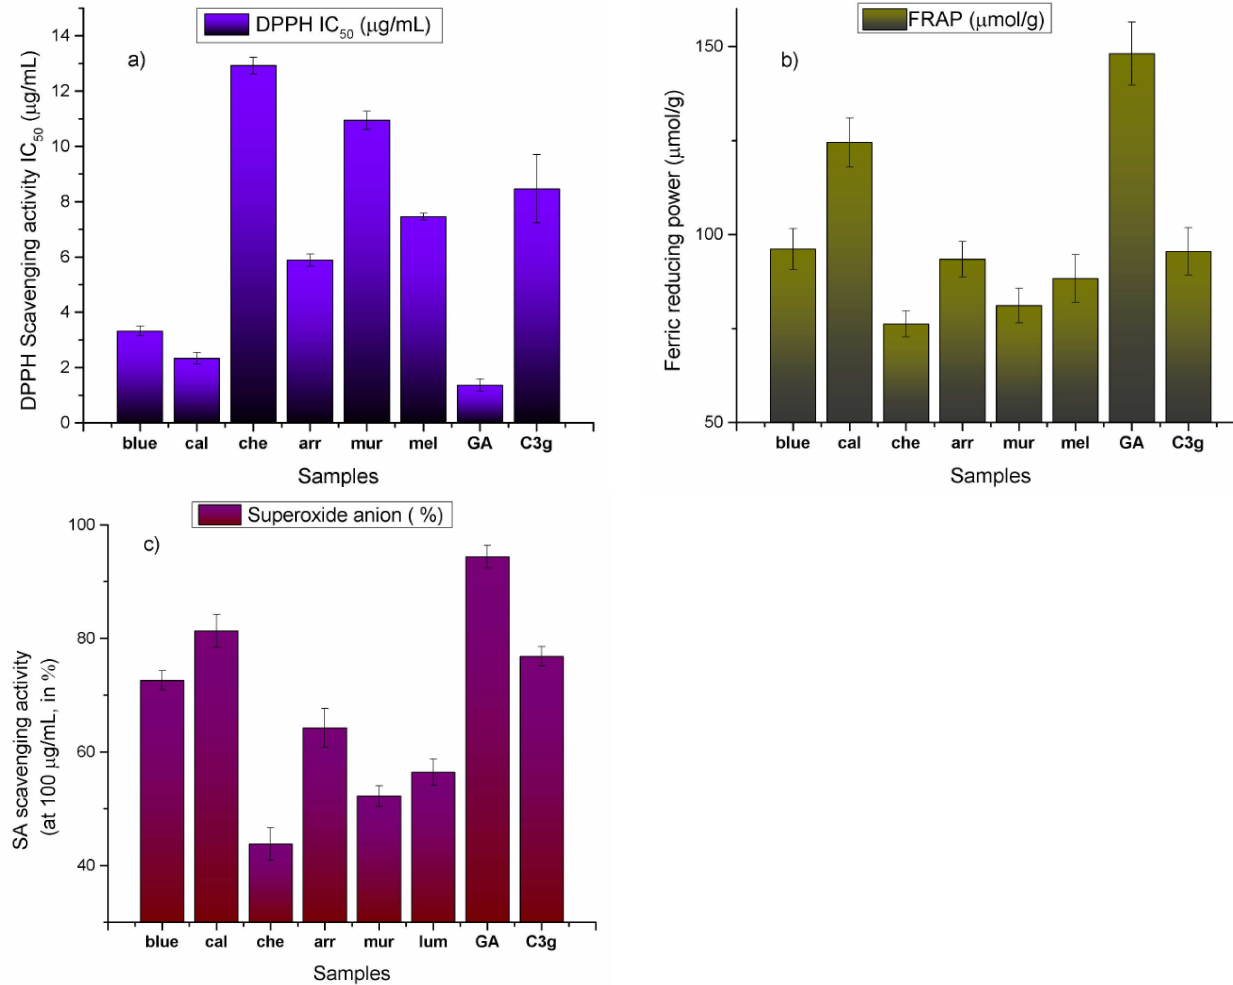

**Figure S2.** Full scan ToF MS spectra of peaks **3**, **8**, **9** and **10**.

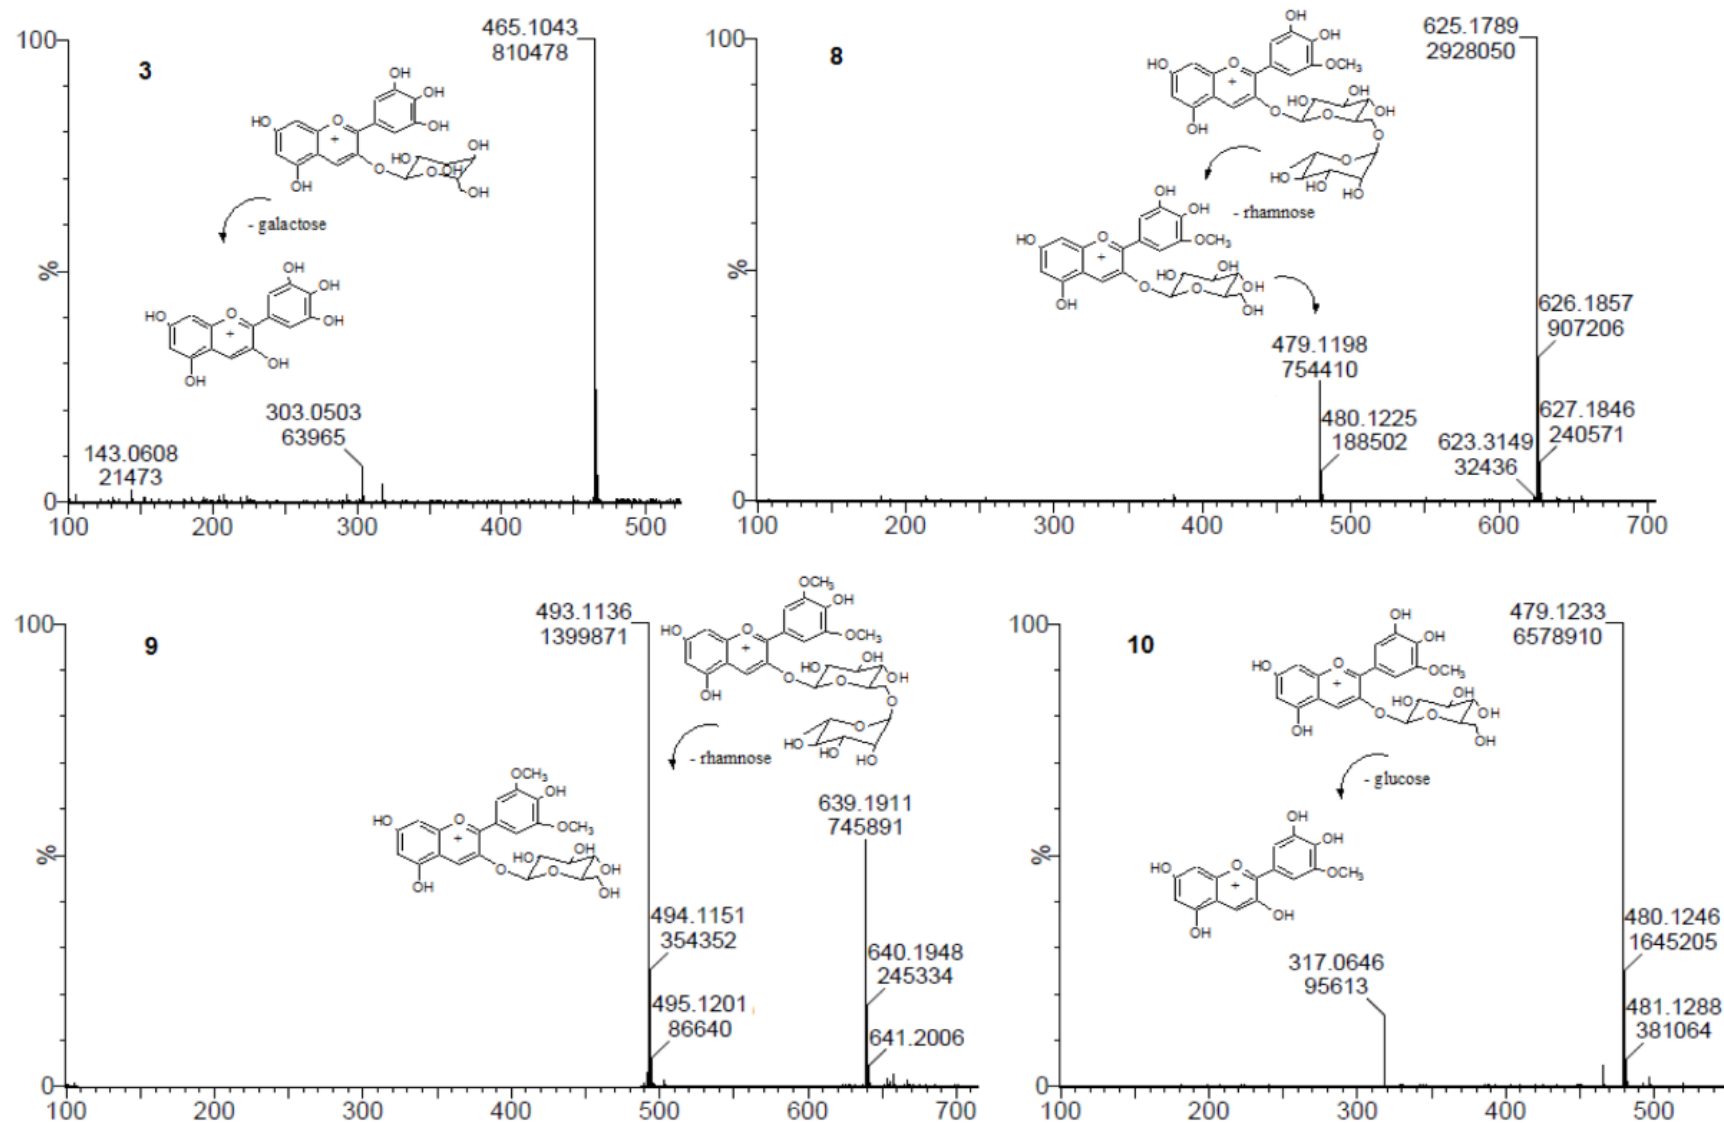

**Figure S3.** Full scan ToF MS spectra of peaks 16, 17, 21, 22 and 28.

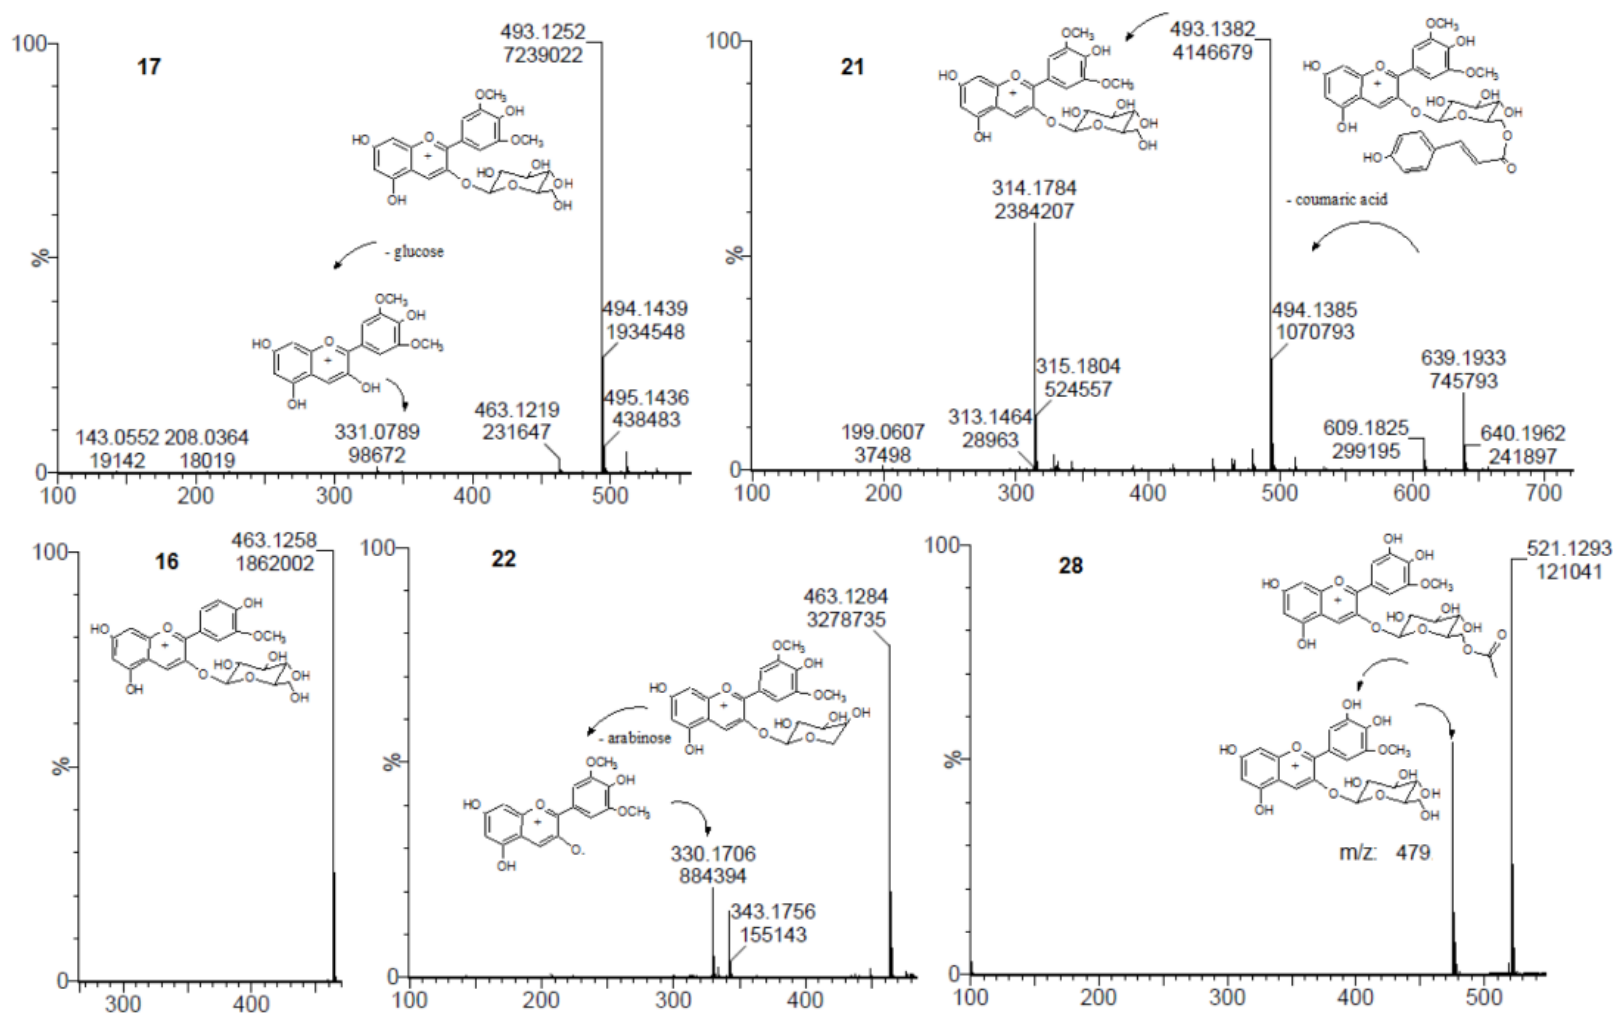

**Figure S4.** Arrayán sample.

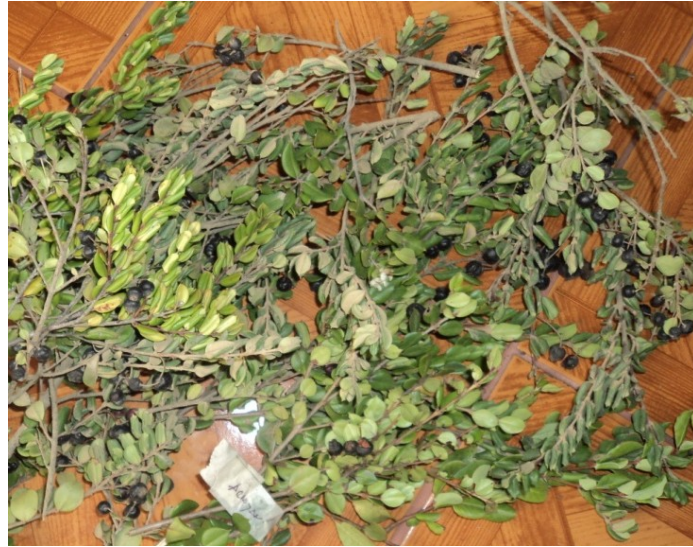

**Figure S5.** Chequén sample.

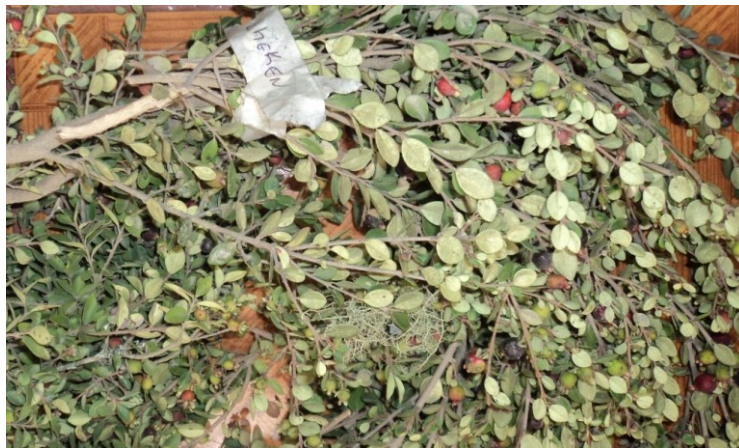

**Figure S6.** Murtilla sample.

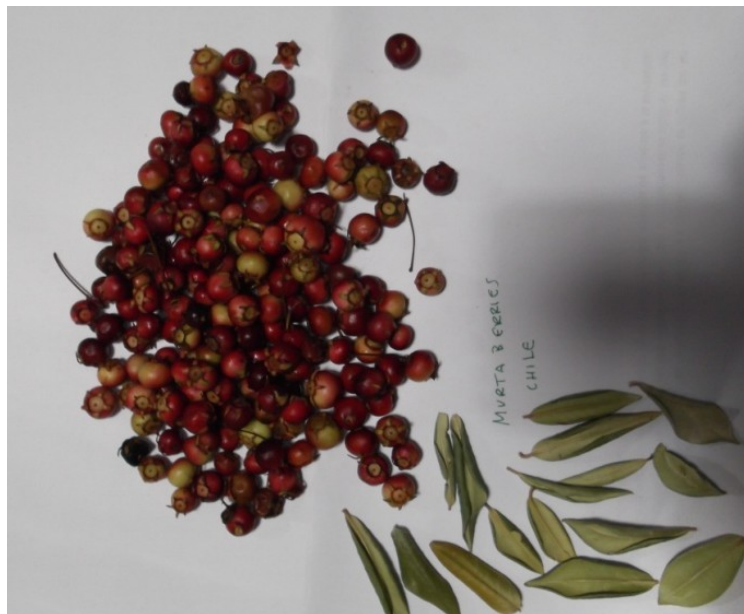



**Figure S7.** Calafate sample.

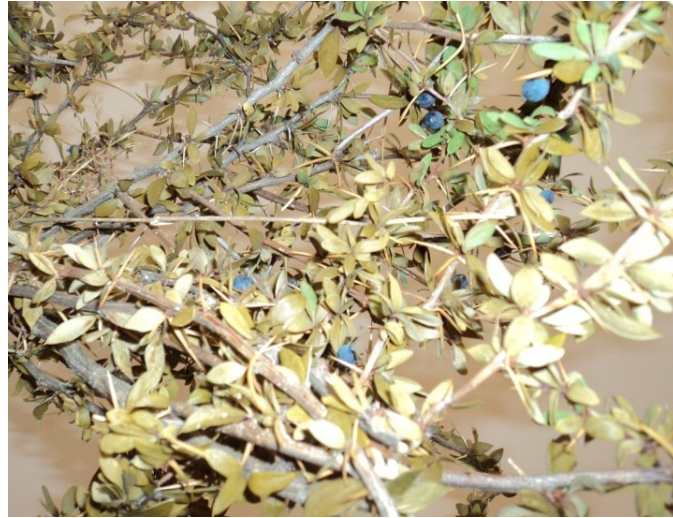

**Figure S8.** Meli sample.

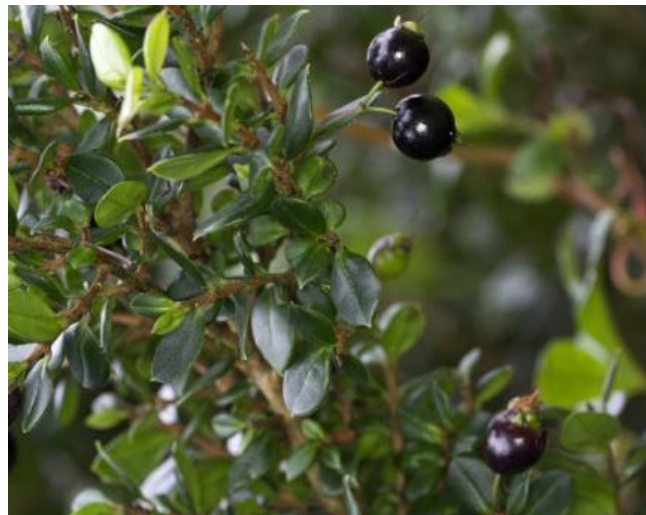

**Figure S9.** Blueberry sample.

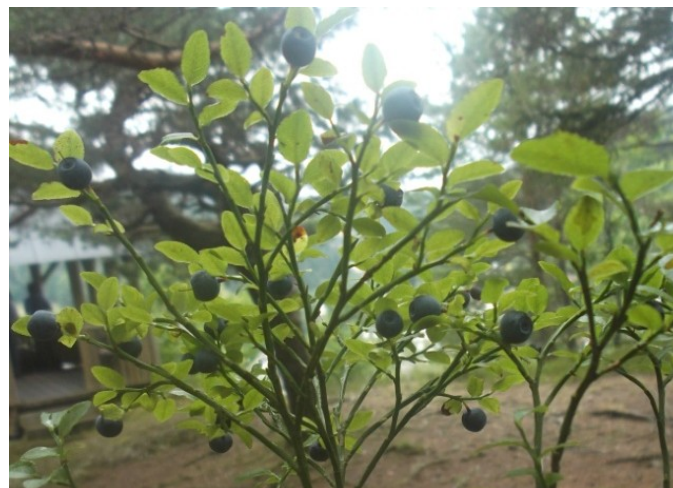

Supplement: molecules-19-10936-s001.pdf [file molecules-19-10936-s001.pdf]
